# Supplementary material for: Layered double hydroxide induced advancement in joint prosthesis using bone cement: the effect of metal substitution
Source: Royal Society of Chemistry journal article supplement (doi:10.1039/c3tb00004d), 2013-01-01
Supplement: c3tb00004d.pdf [file c3tb00004d.pdf]

## Supplementary Information

# Layered double hydroxide induced advancement in joint prosthesis using bone cement: The effect of metal substitution

Govinda Kapusetti, Raghvendra Raman Mishra, Swati Srivastava, Nira Misra, Vakil Singh, Partha Roy, Santhosh Kumar Singh, Chanchal Chakraborty, Sudip Malik, Pralay Maiti

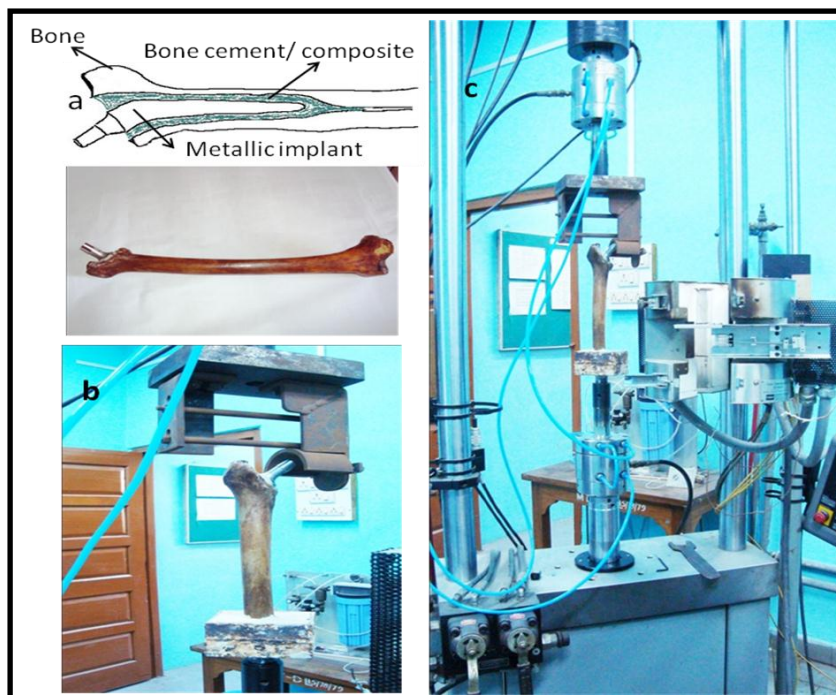

**Supplementary figure S1:** Experimental set up for fatigue testing (a) metallic cemented stem implanted human femur bone and its schematic diagram, (b) human hip joint (ilium) like set up (c) MTS machine with test specimen in position.

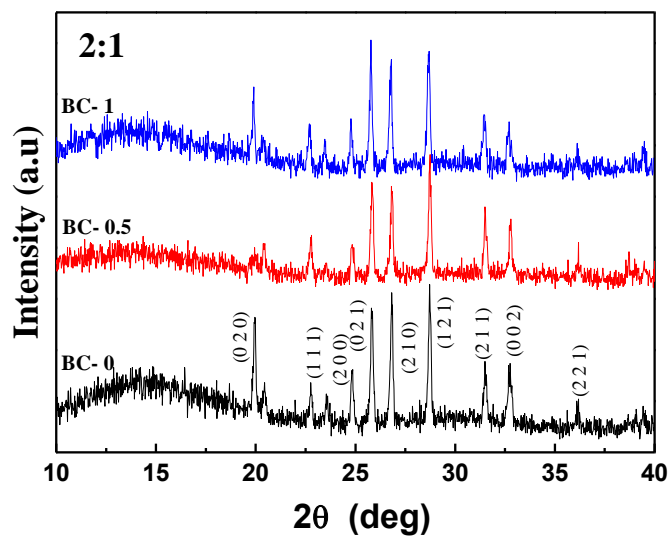

*Supplementary figure S2: XRD patterns of 0.5 and 1wt% nanocomposites of LDH-2:1 and pure bone cement (BC-0) – taken from our previous work (J Biomed Mater Res 2012; 100A: 3363–3373).*
